# Supplementary material for: SARS-CoV-2 Infection Depends on Cellular Heparan Sulfate and ACE2
Source: bioRxiv or medRxiv preprint supplement (doi:10.1101/2020.07.14.201616), 2020-07-14

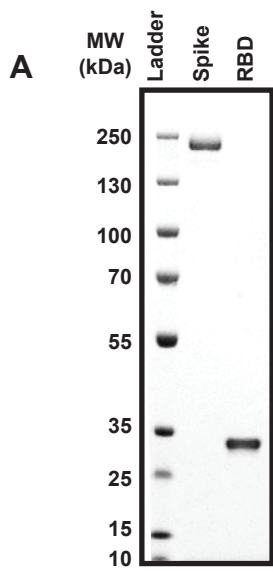

**B**

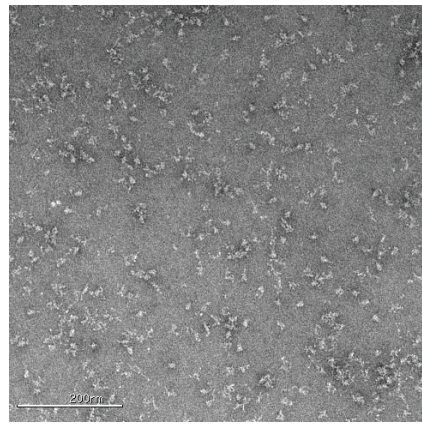

Raw Micrograph

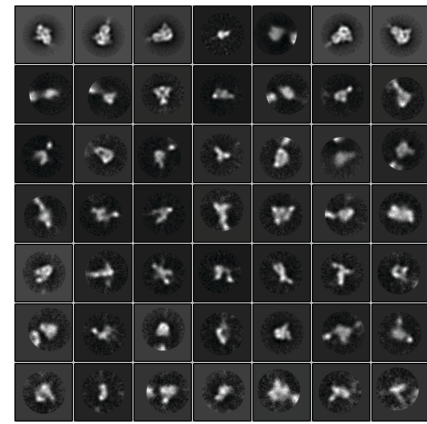

2D Classes

**C**

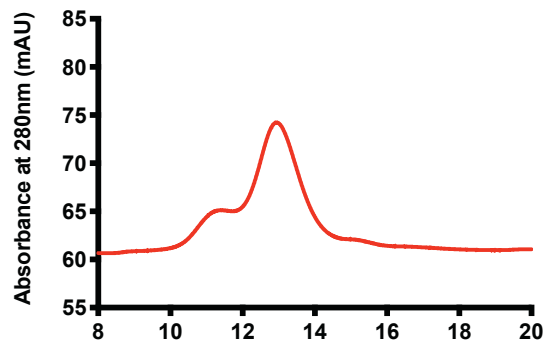

**D**

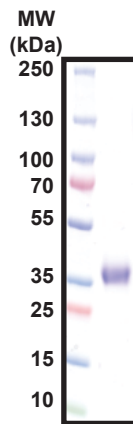

**E**

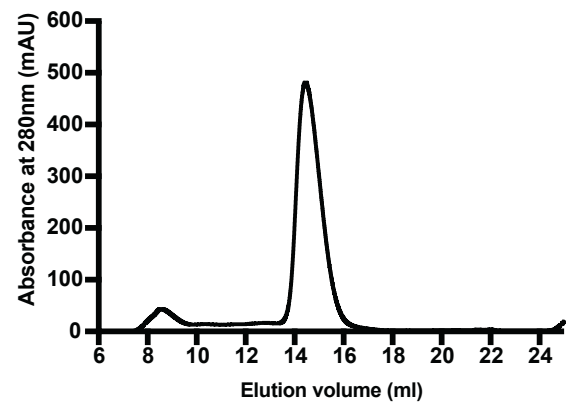

Supplement: Supplementary file [file media-2.pdf]
