# Supplementary material for: SARS-CoV-2 Infection Depends on Cellular Heparan Sulfate and ACE2
Source: bioRxiv or medRxiv preprint supplement (doi:10.1101/2020.07.14.201616), 2020-07-14

A

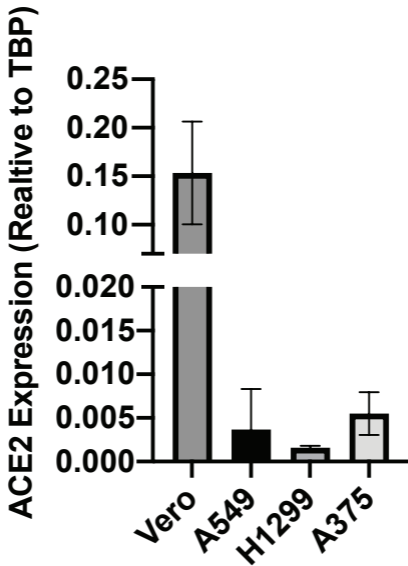

Supplement: Supplementary file [file media-3.pdf]
