# Supplementary material for: SARS-CoV-2 Infection Depends on Cellular Heparan Sulfate and ACE2
Source: bioRxiv or medRxiv preprint supplement (doi:10.1101/2020.07.14.201616), 2020-07-14
Supplement: Supplementary file [file media-4.pdf]

**A**

|          |                                    |                      |          |
|----------|------------------------------------|----------------------|----------|
|          |                                    | sgRNA                | PAM      |
| A375 WT  | ATTGCCATGCACGACGTT                 | TGACCTGCTCCCTCTCAACG | AGGAGCTG |
|          | I A M H D V D L L P L N E E L      |                      |          |
| B4GALT7  | ATTGCCATGCACGACGTTGACCTGCTCCCTCTCA | AAACGAGGAGCTG        |          |
| Clone #5 | I A M H D V D L L P L              |                      | fs       |

**B**

|                  |                                                 |          |                        |
|------------------|-------------------------------------------------|----------|------------------------|
|                  |                                                 | PAM      | sgRNA                  |
| A549 WT          | GCCTTTTTAAAGGAACAGT                             | CCACACTT | TGCCCAAATGTATCCACTACAA |
|                  | A F L K E Q S T L A Q M Y P L Q                 |          |                        |
| ACE2<br>Clone #3 | GCCTTTTTAAAGGAACAGTCCAC-----ATGTGTCCCCTACA      |          |                        |
|                  | A F L K E Q S                                   | fs       |                        |
| ACE2<br>Clone #6 | GCCTTTTTAAAGGAACAGTCCACACTTTATTGCCCAAATGTATCCAC |          |                        |
|                  | A F L K E Q S T L +I A Q M Y P                  |          |                        |
| ACE2<br>Clone #6 | GCCTTTTTAAAGGAACA-----TTGCCCAAATGTATCCACTACAAG  |          |                        |
|                  | A F L K E                                       | fs       |                        |
| ACE2<br>Clone #6 | GCCTTTTTAAAGGAACAGTCC-----CCAAATGTATCCACTACAAG  |          |                        |
|                  | A F L K E Q S                                   | fs       |                        |
